# Supplementary material for: A Composite Score for Predicting Vertical Transmission of Hepatitis C: A Multicenter Study
Source: MDPI journal article supplement (doi:10.3390/pathogens13010045), 2024-01-03
Supplement: s1 [file s1]

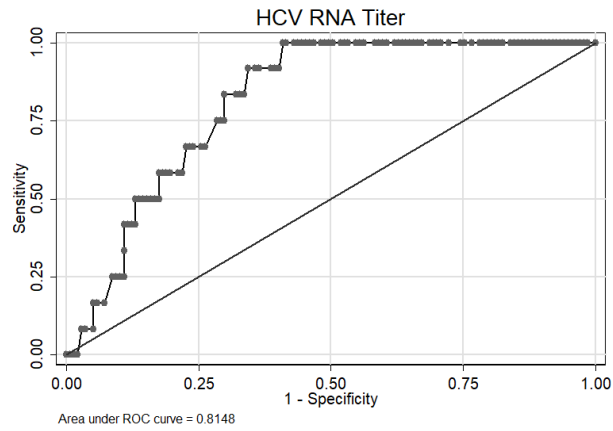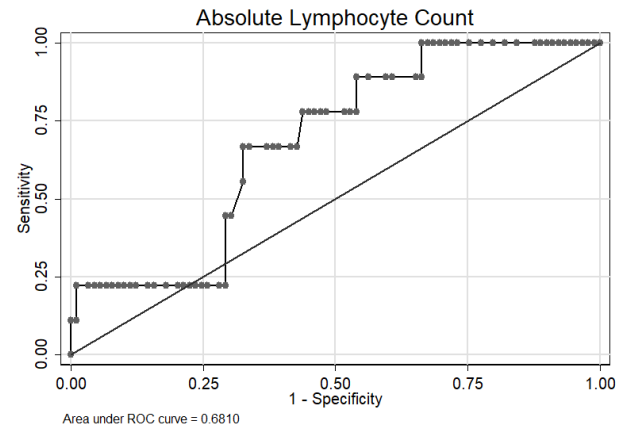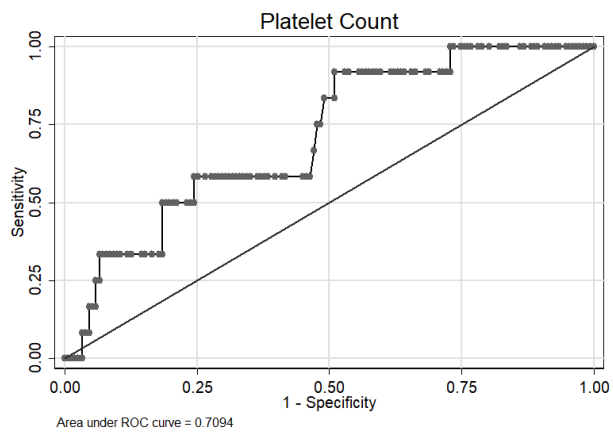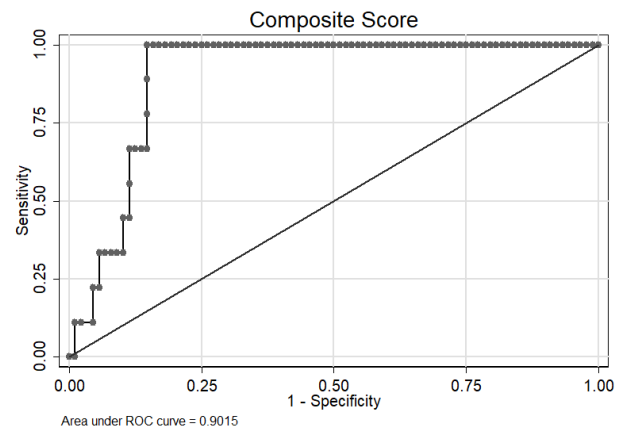

**Supplementary Figure S1.** Receiver operating characteristic curves of significant risk factors for hepatitis C vertical transmission and the resulting composite score.
